## Population Kinetics of 0.9% Saline Distribution in Hemorrhaged Awake and Isoflurane-anesthetized Volunteers: Retraction

At the request of the authors, the Editors and Publisher retract the article “Population Kinetics of 0.9% Saline Distribution in Hemorrhaged Awake and Isoflurane-anesthetized Volunteers” by Nyberg *et al.* published in the September 2019 issue of ANESTHESIOLOGY.

DOI: 10.1097/ALN.0000000000003339

### Reference

1. Nyberg J, Li H, Wessmark P, Winther V, Prough DS, Kinsky MP, Svensén CH. Population kinetics of 0.9% saline distribution in hemorrhaged awake and isoflurane-anesthetized volunteers. *ANESTHESIOLOGY* 2019; 131:501–11. doi: 10.1097/ALN.0000000000002816.
